# Supplementary material for: MYB-Mediated Regulation of Anthocyanin Biosynthesis
Source: PubMed Central journal article supplement (PMC8002911; doi:10.3390/ijms22063103), 2021-03-18
Supplement: ijms-22-03103-s001.pdf [file ijms-22-03103-s001.pdf]

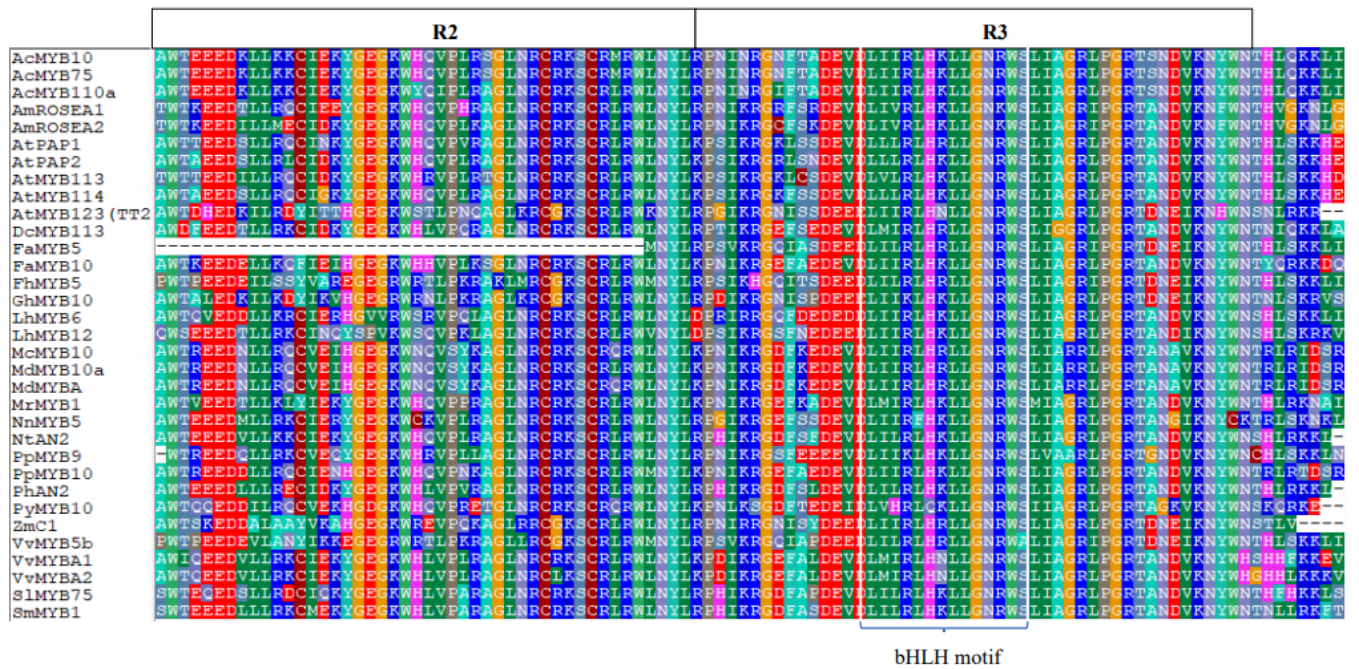

bHLH motif

Supplementary figure1. Multiple alignments of the protein sequences MYB-TFs. The R2 and R3 domains are found. The bHLH binding motif is boxed in the R3 domain.
